# Supplementary material for: CRISPR/Cas9-Mediated Genome Editing Reveals Oosp Family Genes are Dispensable for Female Fertility in Mice
Source: PubMed Central journal article supplement (PMC7226750; doi:10.3390/cells9040821), 2020-03-28
Supplement: cells-09-00821-s001.pdf [file cells-09-00821-s001.pdf]

Supplementary Material

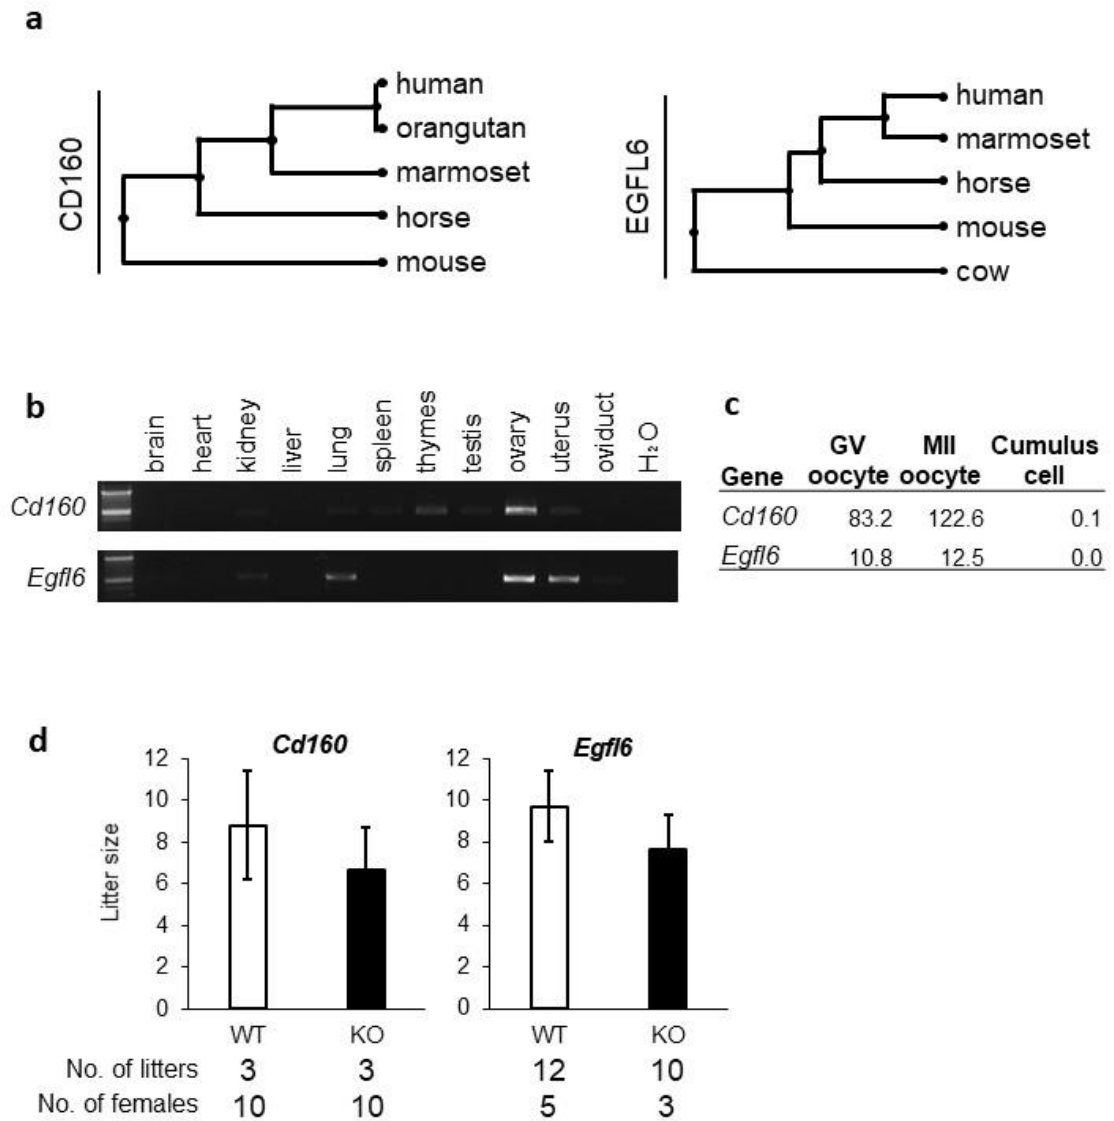

**Figure S1.** Conservation of *Cd160* and *Egfl6* between species, tissue expression analysis, and KO mice fertility. (a) Phylogenetic trees. (b) RT-PCR analysis using multiple tissues. (c) Expression levels in germinal vesicle (GV) oocytes, metaphase II (MII) oocytes and cumulus cells. (d) Average litter size of control and KO females.

**Table S1.** Primers used for RT-PCR analysis.

| <b>Gene</b>  | <b>Upstream</b>           | <b>Downstream</b>         | <b>Band size<br/>(bp)</b> |
|--------------|---------------------------|---------------------------|---------------------------|
| <i>Oosp1</i> | GTCTGCAATGTGCCGACCAC      | CTCAGACCTGCTCGTTTCAG      | 464                       |
| <i>Oosp2</i> | AGTCTGCCGGATGGGGTCT       | TCCGAGAGGCAGAACAACACTGCAA | 374                       |
| <i>Oosp3</i> | ATGAAGGCCTTCGTTGCTTC      | AGTACCAGGAACCAGCATTG      | 470                       |
| <i>Cd160</i> | GCTGGCAATTGTGAACTTCC      | AACTGAGAGTGCCGTTGATA      | 428                       |
| <i>Egfl6</i> | GGTGCAAGTTCGGTGAGTGT      | CGGGTATTGAGGCAATTGGC      | 517                       |
| <i>Actb</i>  | CATCCGTAAAGACCTCTATGCCAAC | ATGGAGCCACCGATCCACA       | 171                       |

**Table S2.** sgRNAs used for generating knockout mice. sgRNAs used for generating *Oosp* family knockout mice targeted the gene's upstream (U) and downstream (D) regions. EP: electroporation

| Gene                  | sgRNA (5'→3')        |                      | PAM | Mutation  |
|-----------------------|----------------------|----------------------|-----|-----------|
| <i>Oosp1</i>          | -                    |                      | -   | COMP tm1b |
| <i>Oosp2</i>          | GTGCGTGTATTTGAGTTACA |                      | CGG | -11/-11   |
| <i>Oosp3</i>          | GCTGCCCAGTAACTTCCATA |                      | AGG | -26/-26   |
| <i>Oosp</i><br>family | U                    | TATGCCACTATCTACTGAGG | AGG | -64159/   |
|                       | D                    | ATGCTGCTGTGGCAAGTCAA | CGG | -64159    |
| <i>Cd160</i>          | AGGGCACAGCAGCTTTGGCC |                      | AGG | -20/-20   |
| <i>Egfl6</i>          | CAGCCTGGGGTCTGTCAGTA |                      | TGG | +1/+1     |

**Table S3.** Efficiency of generating knockout mice. EP: electroporation.

| <b>Gene</b>        | <b>method</b>     | <b>No. of transferred egg</b> | <b>GMO / pups genotyped</b> |
|--------------------|-------------------|-------------------------------|-----------------------------|
| <i>Oosp1</i>       | COMP tm1b         | *ES                           | *ES 24/28                   |
| <i>Oosp2</i>       | Plasmid injection | 87                            | 2/19 (11%)                  |
| <i>Oosp3</i>       | Plasmid injection | 102                           | 3/26 (12%)                  |
| <i>Oosp</i> family | EP                | 93                            | 7/33 (21%)                  |
| <i>Cd160</i>       | Plasmid injection | 72                            | 1/3 (33%)                   |
| <i>Egfl6</i>       | Plasmid injection | 75                            | 1/6 (17%)                   |

**Table S4.** Primers used for genotyping analysis and conditions of PCR.

| Gene               | Allele | Forward primer                     | Reverse primer                         | Annealing | Elongation | Band Size (bp) |
|--------------------|--------|------------------------------------|----------------------------------------|-----------|------------|----------------|
| <i>Oosp1</i>       | WT     | GTGCCGACCACTGGTTC<br>CATC          | GCACTGTTACAGCACAG<br>CCTCTC            | 65°C,30s  | 72°C,30s   | 532            |
|                    | KO     | CACACCTCCCCCTGAAC<br>CTGAAAC       | GCACTGTTACAGCACAG<br>CCTCTC            | 65°C,30s  | 72°C,30s   | 331            |
| <i>Oosp2</i>       | WT     | GTCCATCCTTTTCGTCAC<br>AGCTCC       | CATGCATATGGATCAGT<br>TAAAGGACC         | 60°C,30s  | 72°C,30s   | 406            |
|                    | KO     | GTCCATCCTTTTCGTCAC<br>AGCTCC       | CATGCATATGGATCAGT<br>TAAAGGACC         | 60°C,30s  | 72°C,30s   | 395            |
| <i>Oosp3</i>       | WT     | AACTTCTGAGTGTTTTG                  | ATTATCCTATACATGGC<br>AAG               | 60°C,30s  | 72°C,30s   | 577            |
|                    | KO     | AACTTCTGAGTGTTTTG                  | ATTATCCTATACATGGC<br>AAG               | 60°C,30s  | 72°C,30s   | 551            |
| <i>Oosp family</i> | WT     | TGCCTACCTCCTGTCCT<br>AACAACTG      | CTTGCAGTGATTCTGTT<br>GTCTCTG           | 60°C,30s  | 72°C,30s   | 746            |
|                    | KO     | TGCCTACCTCCTGTCCT<br>AACAACTG      | CACTGATAGTTATTTTC<br>ATAGGTATTACAAAAGG | 60°C,30s  | 72°C,30s   | 366            |
| <i>Cd160</i>       | WT     | AACACGGGCTATTCACC<br>AAAGGAGC      | GACTTTGTGAAATGCCT<br>TGGCTC            | 60°C,30s  | 72°C,30s   | 653            |
|                    | KO     | AACACGGGCTATTCACC<br>AAAGGAGC      | GACTTTGTGAAATGCCT<br>TGGCTC            | 60°C,30s  | 72°C,30s   | 633            |
| <i>Egfl6</i>       | WT     | CTAACTCAGAATTCT<br>TTATCCACAGTCCAT | GTGAAGTGCAACCACT<br>CTGGACACTGCAC      | 60°C,30s  | 72°C,30s   | 304            |
|                    | KO     | CTAACTCAGAATTCT<br>TTATCCACAGTCCAT | GTGAAGTGCAACCACT<br>CTGGACACTGCAC      | 60°C,30s  | 72°C,30s   | 305            |
